# Supplementary material for: Microporous structure and enhanced hydrophobicity in methylated SiO2 for molecular separation
Source: Royal Society of Chemistry journal article supplement (doi:10.1039/b610311a), 2007-01-01

### Supplementary Information:

Scanning Electron Micrographs of silica prepared from an undiluted (a) and diluted (b) TEOS-based sol.

(a)

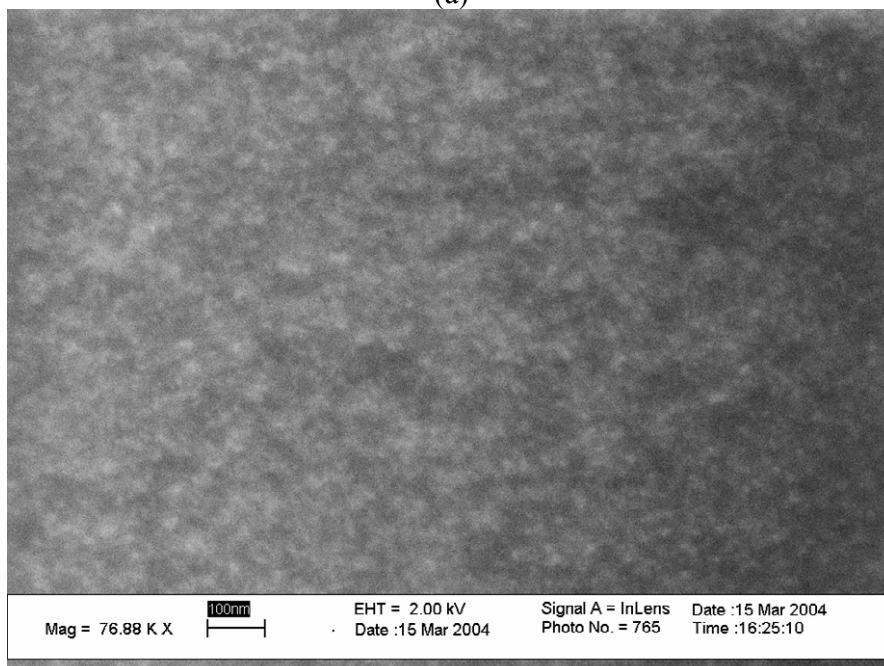

(b)

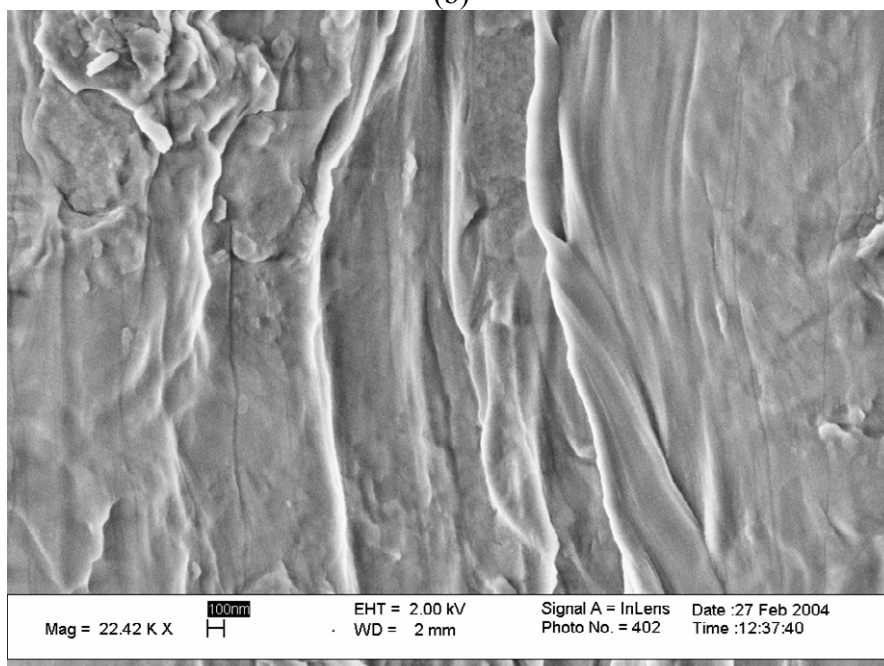

Supplement: b610311a.pdf [file b610311a.pdf]
